# Supplementary material
Source: PubMed Central journal article supplement (PMC4751823)
Supplement: AEM.03355-15_zam999116930so1.pdf [file AEM.03355-15_zam999116930so1.pdf]

# Expression of *kdgR* in intact tomatoes and soft rots

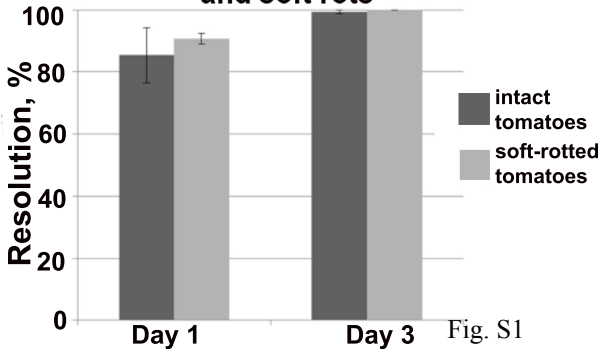

**Fig. S1. Regulation of the *kdgR* RIVET reporter in intact and soft rotted tomatoes.**

A *kdgR::tnpR-lacZY* reporter in *S. enterica* sv Typhimurium 14028 was inoculated into tomatoes with or without *Pectobacterium carotovorum* SR38. Following 1 or 3 days of incubation, samples were plated and scored for the loss of the tetracycline marker. Error bars were standard errors

# Color key and histogram

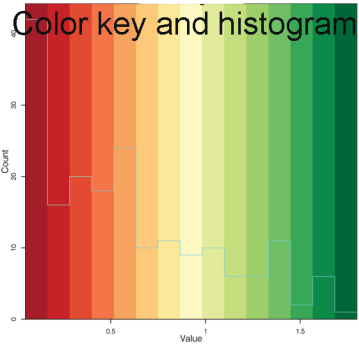

Fig.S2. Carbon source utilization

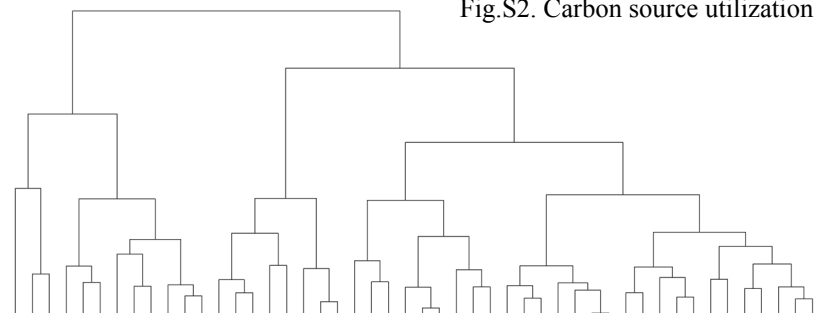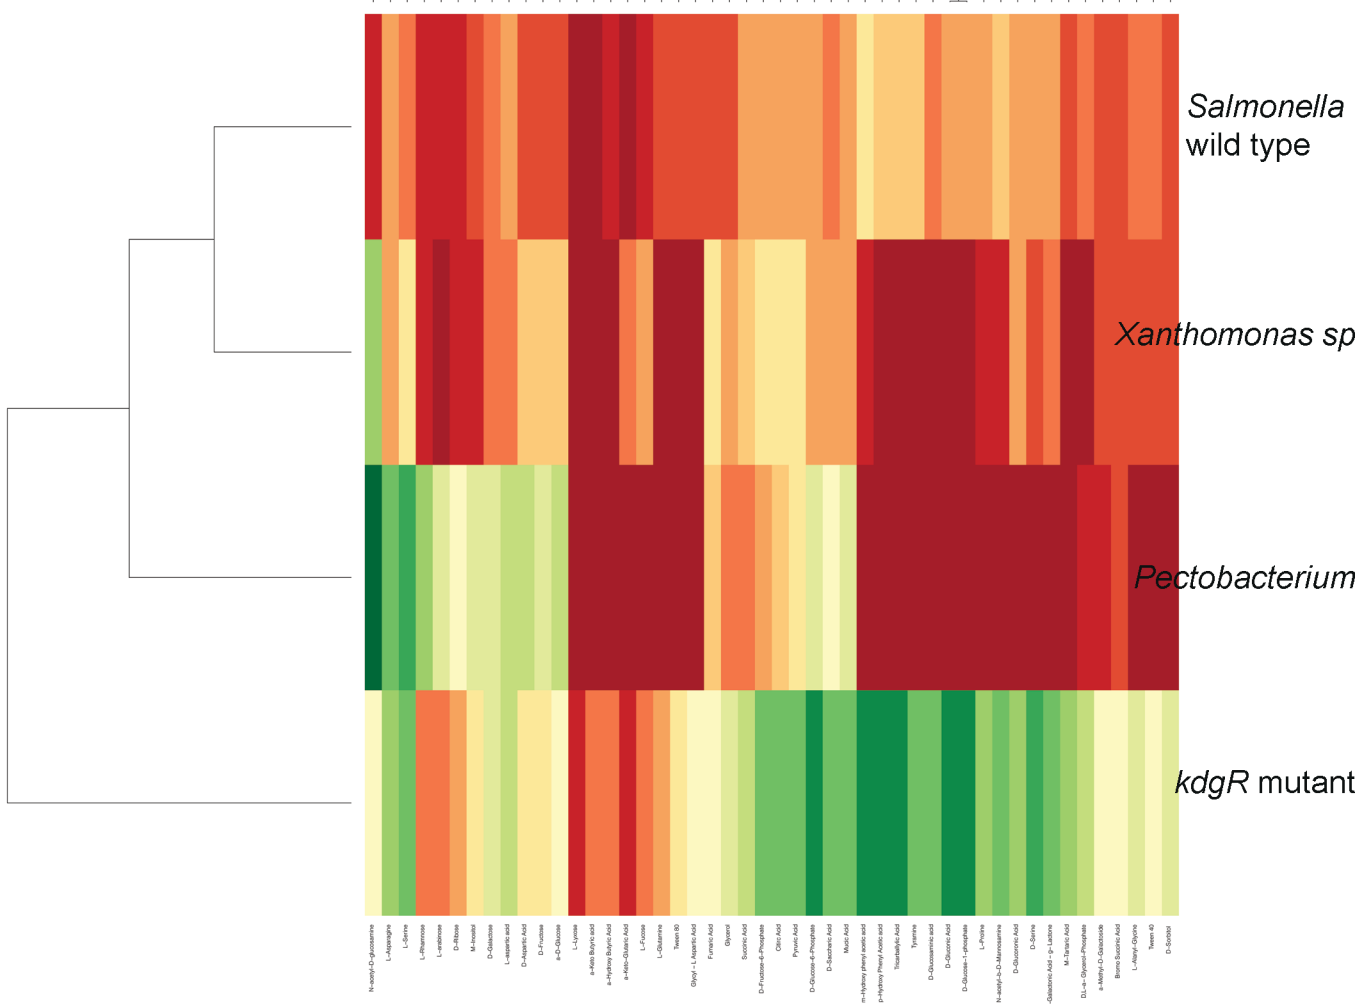

**Supplemental Figure 2. Utilization of carbon sources in BIOLOG PM1 and PM2** by *S. enterica* sv Typhimurium 14028, *S. enterica* sv Typhimurium AG1 (*kdgR::frit*), *P. carotovorum* SR38 and *Xanthomonas sp.* Carbon sources that were not utilized by any of the strains are not shown. Heat maps indicate intensity of the respiration on a given carbon source (dark red – no utilization, dark green – strong respiration), color key is shown in the top left corner. The heat map was constructed using `heatmap.2` from the R package *gplots*. The dendrogram imposed over the rows and columns was constructed with a complete linkage hierarchical clustering using the Euclidean distance between the mean absorbance values.

**Table S1. Primers used in this study.**

| Primer Name | Sequence                                                               | Description                              |
|-------------|------------------------------------------------------------------------|------------------------------------------|
| JTN177      | TCGTAGCTGCTTTTTTTTAAACGTCATGCTAATAACGTTGCTGTAGGCTGGAGCTGCTTCG          | <i>kdgR</i> deletion forward primer      |
| JTN178      | TCGTTCTGAATTTTATAAAACGCTCGTAATGAGGTGATAACATATGAATATCCTCCTTAG           | <i>kdgR</i> deletion reverse primer      |
| JTN179      | TTTCCGACTGTCCCAITTTTCAGAA                                              | <i>kdgR</i> verification forward primer  |
| JTN180      | GCGACCTGGCGTGAAATTATAATA                                               | <i>kdgR</i> verification reverse primer  |
| JTN163      | CGCACACTAACGCTAAITTTTTACAGATCAGGTTCCAGACTTGTAGGCTGGAGCTGCTTCG          | <i>kdgK</i> deletion forward primer      |
| JTN164      | GGCCCGGTAAGCGCAGCGCCACCGGCAAGAGCGAATGACCATATGAATATCCTCCTTAG            | <i>kdgK</i> deletion reverse primer      |
| JTN165      | CGTAGCTGCTGGATAACCTGCTTT                                               | <i>kdgK</i> verification forward primer  |
| JTN166      | CAAGCGGACCGGAATTTAATATG                                                | <i>kdgK</i> verification reverse primer  |
| JTN167      | AAGCGTCGATTTTCCAGAAAACGCAATTTGTGTCAGTAGCGGATGTAGGCTGGAGCTGCTTCG        | <i>kduID</i> deletion forward primer     |
| JTN168      | ATTTTGTGCCATTGCGATCGATTTATCATTGGAGGAAAACATATGAATATCCTCCTTAG            | <i>kduID</i> deletion reverse primer     |
| JTN169      | TTTATCAGTTTTTTTCGGCCAAAGC                                              | <i>kduID</i> verification forward primer |
| JTN170      | TCAAITTCGCACATCAGACCTCGTT                                              | <i>kduID</i> verification reverse primer |
| AG7         | TTTAAATACAAAAATAAAGTTAATTGATGAGCGGAGTATTTTATGTgtaggctggagctgcttcg      | <i>kdgM</i> deletion forward primer      |
| AG8         | TATGAATACTAAGCAAAGATTAGTACAGTAACTCTTTAACTTTCCATATGAATATCCTCCTTAG       | <i>kdgM</i> deletion reverse primer      |
| AG33        | GCGTTGTTGATGGTGTGTTTTG                                                 | <i>kdgM</i> verification forward primer  |
| AG34        | CGCAGGTCATCACCAAGTAA                                                   | <i>kdgM</i> verification reverse primer  |
| AG64        | GTTTGTGATCTTAATTTGATTGAATATAATCGTTATGATTTTATTTCAATTgtaggctggagctgcttcg | <i>kdgT</i> deletion forward primer      |
| AG65        | GTATCATTGATCCGGTAAAATCATCGGCGATAACTATCAITTCATATGAATATCCTCCTTAG         | <i>kdgT</i> deletion reverse primer      |
| AG66        | AACGAAGTCGCCAAACATTC                                                   | <i>kdgT</i> verification forward primer  |
| AG67        | GGCAAATTCGGTTTCCAGTA                                                   | <i>kdgT</i> verification reverse primer  |
| AG92        | CAGTTTTTCATCGGAATCTTCTCTCGCCTGATTACTAGTGTGTCATCTgtaggctggagctgcttcg    | <i>eda</i> deletion forward primer       |
| AG93        | CCTGAAACGATTTTGCCCAATTATCACCGGACATCATGTATTTCACTGCATATGAATATCCTTAG      | <i>eda</i> deletion reverse primer       |
| AG94        | CATCGGAATCTTCTCTCGC                                                    | <i>eda</i> verification forward primer   |
| AG95        | GGTCGTTCTGTGGAATGAGTT                                                  | <i>eda</i> verification reverse primer   |
| AG72        | ATTGAGCTGTCGCAGAAAGG                                                   | <i>kdgK</i> qPCR forward primer          |
| AG73        | CCTGACGGGCAATATAAACG                                                   | <i>kdgK</i> qPCR reverse primer          |
| AG74        | CGGTGAGTCCATACTGAGC                                                    | <i>kduID</i> qPCR forward primer         |
| AG75        | CGTCACCTTAGGCGATAACC                                                   | <i>kduID</i> qPCR reverse primer         |
| AG76        | TCTGGCGGAAAGGGTTAGC                                                    | <i>araH</i> qPCR forward primer          |
| AG77        | TCCGGAAGGTGTCTATGTGG                                                   | <i>araH</i> qPCR reverse primer          |
| AG78        | CTGCGGGAATTGAAAGACC                                                    | <i>fruF</i> qPCR forward primer          |
| AG79        | CAAACCTCGACCTTTCTTGG                                                   | <i>fruF</i> qPCR reverse primer          |
| AG82        | GCCTGGAAGTGGTTAATGTCC                                                  | <i>edd</i> qPCR forward primer           |
| AG83        | TCAACTGGGATGACTTCTCG                                                   | <i>edd</i> qPCR reverse primer           |
| AG84        | CCATAGTCCATGCCAACAT                                                    | <i>eda</i> qPCR forward primer           |
| AG85        | GACTGACTGAGCCACTGCTG                                                   | <i>eda</i> qPCR reverse primer           |
| AG88        | CGAATAATATCGCAAGATCG                                                   | <i>iroN</i> qPCR forward primer          |
| AG89        | CGCCGAGCAAGTATTAAGC                                                    | <i>iroN</i> qPCR reverse primer          |
| AG90        | GGAAAACCTGCCTGAGTTTG                                                   | <i>soda</i> qPCR forward primer          |
| AG91        | GACTGACTGAGCCACTGCTG                                                   | <i>soda</i> qPCR reverse primer          |

**Table S2. *Salmonella* genomes used in the bioinformatics analysis to define consensus KdgR binding sites**

| <b>Strain</b>               | <b>Type</b>    | <b>RefSeq ID</b> | <b>Total genes</b> | <b>Length (mb)</b> |
|-----------------------------|----------------|------------------|--------------------|--------------------|
| Agona SL483                 | Chromosome     | NC_011149.1      | 4881               | 4.8                |
|                             | Plsm unnamed   | NC_011148.1      | 53                 | 0.037978           |
| Arizonae 62:z4,z23          | Chromosome     | NC_010067.1      | 4671               | 4.6                |
| Choleraesuis SC-B67         | Chromosome     | NC_006905.1      | 4641               | 4.76               |
|                             | pSC138         | NC_006856.1      | 170                | 0.138742           |
|                             | pSCV50         | NC_006855.1      | 51                 | 0.049558           |
| Dublin CT_02021853          | Chromosome     | NC_011205.1      | 4952               | 4.84               |
|                             | PCT02021853_74 | NC_011204.1      | 122                | 0.074551           |
| Enteritidis P125109         | Chromosome     | NC_011294.1      | 4420               | 4.69               |
| Gallinarum 287/91           | Chromosome     | NC_011274.1      | 4371               | 4.66               |
| Gallinarum/pullorum RKS5078 | Chromosome     | NC_016831.1      | 4682               | 4.64               |
| Heidelberg B182             | Chromosome     | NC_017623.1      | 4580               | 4.75               |
|                             | pB182_37       | NC_017624.1      | 44                 | 0.037581           |
| Heidelberg SL476            | Chromosome     | NC_011083.1      | 4904               | 4.89               |
|                             | pSL476_3       | NC_011082.1      | 4                  | 0.003373           |
|                             | pSL476_91      | NC_011081.1      | 131                | 0.091374           |
| Newport SL254               | Chromosome     | NC_011080.1      | 4809               | 4.83               |
|                             | pSL254_3       | NC_011079.1      | 5                  | 0.003605           |
|                             | pSN254         | NC_009140.1      | 198                | 0.176473           |
| Paratyphi A AKU_12601       | Chromosome     | NC_011147.1      | 4404               | 4.58               |
| Paratyphi A ATCC 9150       | Chromosome     | NC_006511.1      | 4402               | 4.59               |
| Paratyphi B SPB7            | Chromosome     | NC_010102.1      | 5771               | 4.86               |
| Paratyphi C RKS4594         | Chromosome     | NC_012125.1      | 4827               | 4.83               |
|                             | pSPCV          | NC_012124.1      | 65                 | 0.055414           |
| Schwarzengrund CVM19633     | Chromosome     | NC_011094.1      | 4743               | 4.71               |
|                             | pCVM19633_110  | NC_011092.1      | 129                | 0.110227           |
|                             | pCVM19633_4    | NC_011093.1      | 5                  | 0.004585           |
| Typhi CT18                  | Chromosome     | NC_003198.1      | 4455               | 4.81               |
|                             | pHCM1          | NC_003384.1      | 246                | 0.21816            |
|                             | pHCM2          | NC_003385.1      | 129                | 0.106516           |
| Typhi P-stx-12              | Chromosome     | NC_016832.1      | 4885               | 4.77               |
|                             | Plsm unnamed   | NC_016825.1      | 236                | 0.181431           |
| Typhi Ty2                   | Chromosome     | NC_004631.1      | 4678               | 4.79               |
| Typhi Ty21a                 | Chromosome     | NC_021176.1      | 4601               | 4.79               |
| Typhimurium 14028S          | Chromosome     | NC_016856.1      | 5516               | 4.87               |
|                             | Plsm unnamed   | NC_016855.1      | 103                | 0.093832           |
| Typhimurium 798             | Chromosome     | NC_017046.1      | 4471               | 4.88               |

|                     |                 |             |      |          |
|---------------------|-----------------|-------------|------|----------|
|                     | p798_93         | NC_017054.1 | 104  | 0.093877 |
| Typhimurium D23580  | Chromosome      | NC_016854.1 | 4556 | 4.88     |
| Typhimurium LT2     | Chromosome      | NC_003197.1 | 4631 | 4.86     |
|                     | pSLT            | NC_003277.1 | 112  | 0.093939 |
| Typhimurium SL1344  | Chromosome      | NC_016810.1 | 4622 | 4.88     |
|                     | pRSF1010_SL1344 | NC_017719.1 | 12   | 0.008688 |
|                     | pSLT_SL1344     | NC_017720.1 | 102  | 0.093842 |
|                     | pCol1B9_SL1344  | NC_017718.1 | 101  | 0.086908 |
| Typhimurium ST4/74  | Chromosome      | NC_016857.1 | 4775 | 4.88     |
|                     | TY474p1         | NC_016858.1 | 116  | 0.093842 |
|                     | TY474p2         | NC_017675.1 | 90   | 0.086908 |
|                     | TY474p3         | NC_016859.1 | 11   | 0.008688 |
| Typhimurium T000240 | Chromosome      | NC_016860.1 | 4823 | 4.95     |
|                     | pSTMDT12_S      | NC_016862.1 | 10   | 0.00867  |
|                     | pSTMDT12_L      | NC_016861.1 | 139  | 0.10651  |
| Typhimurium U288    | Chromosome      | NC_021151.1 | 4682 | 4.85     |
|                     | pSTU288-1       | NC_021155.1 | 200  | 0.148711 |
|                     | pSTU288-2       | NC_021156.1 | 12   | 0.011067 |
|                     | pSTU288-3       | NC_021157.1 | 5    | 0.004675 |
| Typhimurium UK-1    | Chromosome      | NC_016863.1 | 4582 | 4.82     |
|                     | pSTUK-100       | NC_016864.1 | 101  | 0.093277 |

**Table S3. Predicted *Salmonella* gene targets of KdgR**

|             | <b>Gene, predicted function</b>                                                      | <b>End Position*</b> | <b>Start Position**</b> | <b>Weight Score</b> | <b>P-value</b> |
|-------------|--------------------------------------------------------------------------------------|----------------------|-------------------------|---------------------|----------------|
| <i>kduI</i> | 5-keto-4-deoxyuronate isomerase                                                      | -123                 | -103                    | 17.9                | 1.20E-09       |
|             |                                                                                      | -58                  | -38                     | 10.7                | 1.30E-06       |
| <i>yjgK</i> | hypothetical                                                                         | -32                  | -12                     | 16.4                | 1.10E-08       |
| <i>ydiA</i> | (divergently transcribed from <i>pps</i> )<br>phosphoenolpyruvate regulatory protein | -131                 | -111                    | 16.3                | 1.20E-08       |
| <i>pps</i>  | (divergently transcribed from <i>ydiA</i> )<br>phosphoenolpyruvate synthase          | -226                 | -206                    | 16.3                | 1.20E-08       |
| <i>yjhH</i> | cyclic-di-GMP phosphodiesterase                                                      | -164                 | -144                    | 15.7                | 2.30E-08       |
| <i>kdgK</i> | ketodeoxygluconokinase                                                               | -85                  | -65                     | 15.7                | 2.30E-08       |
| <i>yeeO</i> | MATE-family multidrug exporter                                                       | -7                   | 13                      | 15.3                | 3.50E-08       |
| STM1911     | glycosyl (rhamnogalacturonyl) hydrolase                                              | -189                 | -169                    | 14.8                | 5.90E-08       |
| STM1934     | outermembrane lipoprotein                                                            | -168                 | -148                    | 13.9                | 1.30E-07       |
| STM1933     | Ribose 5-phosphate isomerase                                                         | -108                 | -88                     | 13.9                | 1.30E-07       |
| <i>ftnB</i> | ferritin-like protein                                                                | -340                 | -320                    | 13.9                | 1.30E-07       |
| <i>araH</i> | arabinose permease                                                                   | -231                 | -211                    | 13.9                | 1.30E-07       |
| <i>yifZ</i> | KDG permease                                                                         | -34                  | -14                     | 12.8                | 3.20E-07       |
| <i>setB</i> | sugar efflux transporter                                                             | -108                 | -88                     | 11.5                | 7.80E-07       |
| <i>fruF</i> | PTS, fructose-specific IIA                                                           | -281                 | -261                    | 11.5                | 7.80E-07       |
| STM4509.S   | hypothetical protein                                                                 | -75                  | -55                     | 10.8                | 1.20E-06       |
| <i>thrS</i> | threonine tRNA ligase                                                                | -395                 | -375                    | 10.3                | 1.60E-06       |
| STM4051     | hypothetical protein                                                                 | -42                  | -22                     | 9.8                 | 2.20E-06       |
| STM1043     | attachment and invasion protein                                                      | 72                   | 92                      | 9.3                 | 2.90E-06       |
| <i>deoB</i> | phosphopentomutase                                                                   | -2                   | 18                      | 9.2                 | 3.10E-06       |
| <i>dpiB</i> | histidine sensor kinase                                                              | 14                   | 34                      | 8.4                 | 4.70E-06       |
| <i>yebB</i> | uncharacterized protein                                                              | -212                 | -192                    | 8.3                 | 5.00E-06       |
| STM0272     | ATPase with chaperone activity                                                       | -215                 | -195                    | 8.3                 | 5.00E-06       |
| STM0271     | cytoplasmic protein                                                                  | -173                 | -153                    | 8.3                 | 5.00E-06       |
| <i>pdhR</i> | pyruvate dehydrogenase complex repressor                                             | -162                 | -142                    | 8.2                 | 5.30E-06       |
| STM4216     | putative innermembrane protein                                                       | -2                   | 18                      | 8.1                 | 5.50E-06       |
| <i>clpA</i> | ATP-dependent protease                                                               | 13                   | 33                      | 7.6                 | 7.10E-06       |
| <i>ddl</i>  | D-alanine-D-alanine ligase                                                           | 5                    | 25                      | 7.5                 | 7.50E-06       |
| <i>yjcB</i> | hypothetical protein                                                                 | -120                 | -100                    | 7.4                 | 7.90E-06       |
| <i>pykF</i> | pyruvate kinase                                                                      | -286                 | -266                    | 7.4                 | 7.90E-06       |
| STM4510     | aspartate racemase                                                                   | -78                  | -58                     | 7.3                 | 8.30E-06       |
| <i>clpP</i> | ATP-dependent protease                                                               | -157                 | -137                    | 7.3                 | 8.30E-06       |
| STM4435     | 2-keto-myo-inositol isomerase                                                        | 56                   | 76                      | 7                   | 9.70E-06       |
| <i>iroN</i> | iron-enterobactin outer membrane transporter                                         |                      |                         | 7                   | 1.00E-05       |
| <i>yiaK</i> | 2,3-diketo-L-gulonate reductase                                                      | -82                  | -62                     | 6.9                 | 1.00E-05       |



|             |                       |      |      |     |          |
|-------------|-----------------------|------|------|-----|----------|
| <i>yiaJ</i> | IclR family regulator | -168 | -148 | 6.9 | 1.00E-05 |
| <i>yehR</i> | lipoprotein           | -19  | 1    | 6.9 | 1.00E-05 |
| STM4054     | hypothetical protein  | -126 | -106 | 6.9 | 1.00E-05 |
| <i>sodA</i> | superoxide dismutase  | -223 | -203 | 6.9 | 1.00E-05 |

\* Start of the predicted KdgR binding site

\*\* End of the predicted KdgR binding site

**Table S4. Utilization\* of rhamnose, fructose and pyruvate by *S. enterica* sv. Typhimurium 14028 and *S. enterica* sv. Typhimurium AG1 ( $\Delta kdgR$ )**

|          |             | 0 hrs     | 24 hrs    | 48 hrs    |
|----------|-------------|-----------|-----------|-----------|
| Rhamnose | wild type   | 0.04±0.02 | 0.28±0.02 | 0.24±0.01 |
|          | <i>kdgR</i> | 0.04±0.0  | 0.40±0.0  | 0.53±0.0  |
| Fructose | wild type   | 0.04±0.0  | 0.31±0.01 | 0.30±0.02 |
|          | <i>kdgR</i> | 0.04±0.0  | 0.41±0.01 | 0.51±0.01 |
| Pyruvate | wild type   | 0.04±0.02 | 0.26±0.03 | 0.16±0.02 |
|          | <i>kdgR</i> | 0.04±0.0  | 0.22±0.06 | 0.29±0.08 |

\* measured as Absorbance at 590 nm
